# Supplementary material for: Phytogenic Fabrication of Ag–Fe Bimetallic Nanoparticles for Cell Cycle Arrest and Apoptosis Signaling Pathways in Candida auris by Generating Oxidative Stress
Source: MDPI journal article supplement (doi:10.3390/antiox10020182), 2021-01-27
Supplement: s1 [file s1]

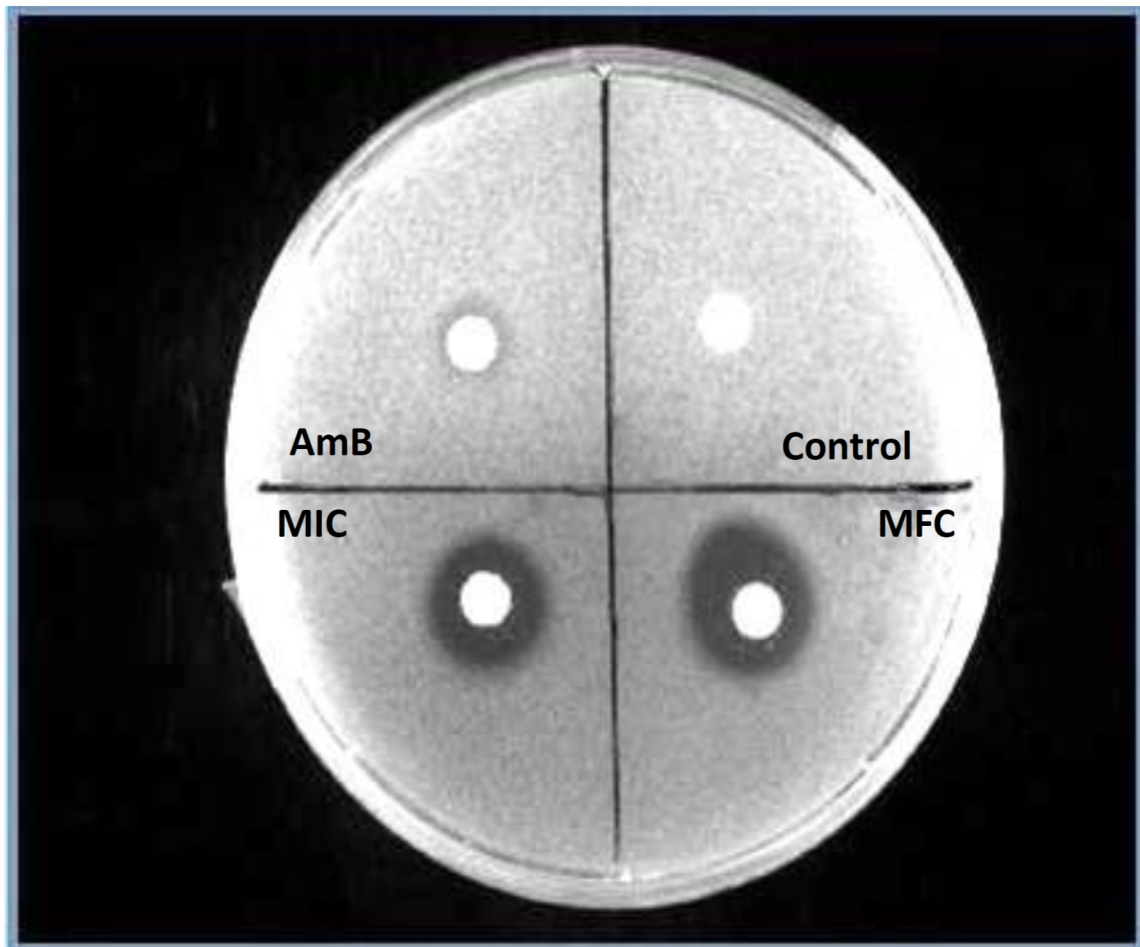

**Figure S1.** Disc diffusion assay of Ag-Fe NPs against *C. auris* MRL6057. MIC and MFC represent 0.39 and 0.78  $\mu\text{g/mL}$  of Ag-Fe NPs, whereas control discs were impregnated with 1% DMSO. AmB represents discs impregnated with 2  $\mu\text{g/mL}$  of amphoterecin B.
